# Supplementary material for: Genetic Gain for Grain Micronutrients and their Association with Phenology in Historical Wheat Cultivars of Pakistan Released between 1909 and 2018 in Pakistan
Source: Preprints.org preprint supplement (doi:10.20944/preprints202105.0283.v1), 2021-05-13
Supplement: Supplementary file 1 [file supplementary]

## Sheet: Table S1
Table S2. Table S1. Genetic gain analysis for micronutrients and morphological traits in historical wheat cultivars of Pakistan.
Parameters	Al	Ca	Cu	Fe	K	Mg	Mn	Na	P	Zn	Se	TPP	PH	SL	SNPS	YPP	TGW	GL	GW	GD
genetic gain value	-0.01	-0.23	-0.009	-0.02	2.299	-0.85	0.002	-0.07	-1.523	-0.05	0	-0.006	-0.174	0.01	-0.01	0.01	-0.01	0	0	0
P_value forGG	0.02	0.4208	0.001	0.12	0.2	0.04	0.875	0.53	0.21	0.001	0.18	0.007173	0.001	0.05	0.003	1.036e-12	0.58	0.42	0.18	0.017
R2 for GG	0.067	-0.0056	0.15	0.022	0.01	0.05	-0.01	0	0.009	0.149	0.013	0.0996	0.134	0.04	0.12	0.5667	0.01	-0.005	0.01	0.07

## Sheet: Table S2
Table S2. BLUEs for all phenotypes and the genotypic data used in this study
Varieties	Group	RHT.8	RhtB1	RhtD1	Rht1	TaSus2.2B	TaGW2-6B	TaGW2-6A	NAM-A1	Fe.EDXRF	Zn.EDXRF	Fe.ICPMS	Zn.ICPMS	Al	Ca	Cu	K	Mg	Mn	Na	P	Se	TPP	PH	SL	SpPS	GPS	GY	TKW	GL	GW	GD
Zincol-2016	Post-2000	Rht8	Rht-B1b	Rht-D1a	Rht-B1b.Rht-D1a	Hap-L	Hap-II	Hap-6A-A	TT	44.05	30.8	36.7	27.1	3.71875	435.562	4.28125	3920.78	1131.69	35.1875	12.375	3151.72	0.202844	3.4875	100.475	17.05	19.55	64.05	2.64	39.615	1.2335	2.152	6.6505
Borlaug-2016	Post-2000	rht-8	Rht-B1b	Rht-D1a	Rht-B1b.Rht-D1a	Hap-L	Hap-II	Hap-6A-A	TT	NA	NA	32.6	25.6	3.5	414.688	4	3905.88	1067.19	36.75	11.25	3398.56	0.1345	3.9875	94.85	16.775	18.55	55.5	2.87	41.66	1.169	2.047	6.699
Ahsan-2016	Post-2000	Rht8	Rht-B1b	Rht-D1a	Rht-B1b.Rht-D1a	Hap-L	Hap-II	Hap-6A-A	TT	29.9	28.85	30.9	31.6	4.25	584.812	4.75	4043.5	1062.94	31.625	11	3188.69	0.141875	3.2875	106.525	18.25	19.95	57.325	2.76	38.3775	1.183	2.083	6.076
Gold-2016	Post-2000	Rht8	Rht-B1a	Rht-D1b	Rht-B1a.Rht-D1b	Hap-L	Hap-II	Hap-6A-A	TT	34.05	25.75	33.2	26.6	3.15625	592.625	4.84375	4030.59	1116.06	37.9375	17.625	2992.09	0.250094	3.725	93.6	18.3	20.225	57.075	2.675	40.835	1.519	2.378	6.5055
Johar-2016	Post-2000	Rht8	Rht-B1b	Rht-D1a	Rht-B1b.Rht-D1a	Hap-L	Hap-II	Hap-6A-A	TT	28.6	33.6	33.1	31.4	3.65625	588.812	4.53125	4344.72	1228.19	31.5	21.5625	3333.34	0.248031	3.225	101.4	18.625	21.075	63.925	2.1825	46.835	1.1605	2.311	6.211
Pakhtunkhwa-2015	Post-2000	Rht8	Rht-B1b	Rht-D1a	Rht-B1b.Rht-D1a	Hap-L	Hap-II	Hap-6A-G	CC	29.85	25.9	35.2	29.6	4.53125	598.625	3.96875	4681.03	1137.62	33.1875	62.3125	3171.72	0.223719	3.55	104.825	18.15	19.775	61.675	2.745	44.2125	1.3715	2.2735	6.319
Pakistan-2013	Post-2000	Rht8	Rht-B1b	Rht-D1a	Rht-B1b.Rht-D1a	Hap-L	Hap-II	Hap-6A-A	TT	32.5	28.55	32.5	27.8	3.46875	526.625	3.59375	4143.72	1053.81	36.375	8.9375	3149.41	0.213781	3.375	95.875	17.8	19.075	57.8	2.5825	48.2425	1.2945	2.2735	6.7985
Pirsabak-2013	Post-2000	Rht8	Rht-B1b	Rht-D1a	Rht-B1b.Rht-D1a	Hap-L	Hap-II	Hap-6A-G	CC	28.9	26.1	34.4	26.3	3.25	611.25	3.71875	5343.56	1238.28	38.1875	42	3657.31	0.246469	3.3625	83.05	15.65	18.45	54.025	2.3175	44.77	1.338	2.216	6.418
Shahkar-2013	Post-2000	Rht8	Rht-B1b	Rht-D1a	Rht-B1b.Rht-D1a	Hap-L	Hap-I	Hap-6A-A	CC	36.2	28.05	33.3	25.3	2.5625	535.375	3.65625	3911.31	1181.16	37.625	19	3130.62	0.236469	3.5875	89.3	16.175	19.375	55.525	2.3975	39.9	NA	NA	NA
Galaxy-2013	Post-2000	Rht8	Rht-B1b	Rht-D1a	Rht-B1b.Rht-D1a	Hap-L	Hap-II	Hap-6A-A	TT	32.75	31.35	32.1	30.1	2.9375	549.938	3.78125	4174.56	1149.78	33.4375	42.4375	3067.5	0.260031	3.225	97.075	17.075	19.525	55.325	2.695	45.375	1.501	2.2665	6.309
NARC-2011	Post-2000	Rht8	Rht-B1b	Rht-D1a	Rht-B1b.Rht-D1a	Hap-L	Hap-I	Hap-6A-A	TT	32.1	27.35	35	28.6	4	568.875	4.53125	4720.75	1192.03	32.5625	79.875	3121.19	0.224031	2.9625	87.35	16.225	18.375	53.875	2.16	37.435	1.2845	2.451	6.4275
AAS-2011	Post-2000	Rht8	Rht-B1b	Rht-D1a	Rht-B1b.Rht-D1a	Hap-L	Hap-II	Hap-6A-A	TT	32.6	35.6	37.6	36.6	2.5625	677.188	4.65625	4816.25	1241.28	32.3125	25.25	3347.5	0.240719	2.825	96.75	18.225	20.6	59.825	2.325	39.765	1.433	2.476	6.4275
Dharabi-2011	Post-2000	Rht8	Rht-B1b	Rht-D1a	Rht-B1b.Rht-D1a	Hap-L	Hap-II	Hap-6A-A	TT	32.8	26.35	33.1	27	3	520.688	3.65625	3989.06	1081.91	31.625	20.625	3010.81	0.211094	2.775	97.425	17.175	18.05	47	2.1325	41.15	1.3255	2.098	6.238
Punjab-2011	Post-2000	Rht8	Rht-B1b	Rht-D1a	Rht-B1b.Rht-D1a	Hap-L	Hap-II	Hap-6A-G	TT	31.3	26.4	35.1	27	2.9375	544.812	3.125	4223.94	1160.62	35.75	25.25	3180.75	0.21	2.9875	97.1	17.4	18.425	51.725	3.2175	39.8475	1.358	2.238	6.678
Millat-2011	Post-2000	Rht8	Rht-B1b	Rht-D1a	Rht-B1b.Rht-D1a	Hap-L	Hap-II	Hap-6A-A	CC	38.05	29.25	36.1	26.9	2.0625	544.25	3.40625	3793.38	1079.41	32.5	20.6875	2879.88	0.185531	2.725	91.75	16.825	20.025	53.825	2.5175	38.9975	1.273	2.207	6.359
NARC-2009	Post-2000	Rht8	Rht-B1b	Rht-D1a	Rht-B1b.Rht-D1a	Hap-L	Hap-II	Hap-6A-G	TT	32.95	30.95	34	27.2	3	499.625	3.84375	3806.94	1103.47	29.9375	22.4375	2999.88	0.184781	3.0625	105.6	18.325	19.775	56.925	2.5425	45.2025	1.553	2.1685	6.689
Pirsabak-2008	Post-2000	Rht8	Rht-B1b	Rht-D1a	Rht-B1b.Rht-D1a	Hap-L	Hap-II	Hap-6A-A	CC	26.15	23.7	30.6	23.9	3.90625	541.531	3.8125	4470.69	979.812	31.375	59	2840.56	0.220344	2.9625	81.425	16.125	19.575	54.375	2.4845	33.855	1.2335	2.303	5.9965
Mairaj-2008	Post-2000	Rht8	Rht-B1b	Rht-D1a	Rht-B1b.Rht-D1a	Hap-L	Hap-II	Hap-6A-A	CC	30.3	25.55	36.3	26.8	3.4375	566.438	3.875	4175.69	1087.25	29.25	26.625	2904.38	0.174	2.8875	91.175	16.75	18.725	53.25	2.4575	43.5525	1.45	2.314	6.42
Faisalabad-2008	Post-2000	Rht8	Rht-B1a	Rht-D1a	Rht-B1a.Rht-D1a	Hap-L	Hap-II	Hap-6A-A	TT	35.35	27.25	33.8	24.8	3.40625	615.844	3.9375	4148.62	1064.12	34.9375	12.375	2885	0.205031	3.075	89.025	15.075	18.725	51.95	2.525	44.2475	1.331	2.235	6.3665
Fareed-2006	Post-2000	Rht8	Rht-B1b	Rht-D1a	Rht-B1b.Rht-D1a	Hap-L	Hap-II	Hap-6A-A	TT	36	25.45	35.6	26.8	4.15625	599.531	3.9375	4169.88	1097.25	29	43.1875	2871	0.195469	2.85	87.15	16.725	18.575	55	2.6225	41.51	2.2345	2.404	6.631
Seher-2006	Post-2000	Rht8	Rht-B1a	Rht-D1b	Rht-B1a.Rht-D1b	Hap-L	Hap-I	Hap-6A-A	TT	35.3	26.55	34.6	26.1	3.71875	488.344	3.5625	3955.88	1020.06	33.75	15.75	2882.75	0.219844	2.7375	95.35	16.45	19.25	52.125	2.7975	42.54	1.401	2.113	6.484
Chakwal-50	Post-2000	Rht8	Rht-B1a	Rht-D1a	Rht-B1a.Rht-D1a	Hap-L	Hap-II	Hap-6A-G	CC	28.75	32.65	30.4	29	3.53125	507.031	3.25	4459.31	1128.62	30.3125	37	2975.19	0.215781	3.225	86.175	15.1	19.025	50	2.34	45.11	1.472	2.192	6.367
Atta-Habib	Post-2000	Rht8	Rht-B1a	Rht-D1a	Rht-B1a.Rht-D1a	Hap-L	Hap-I	Hap-6A-A	TT	34.95	26.75	34.6	26.2	4.40625	575.656	3.75	3997.12	1214.38	30.125	49.9375	3143.12	0.199281	3.1625	94.475	16.075	19.05	52.7	1.9575	36.67	1.431	2.317	6.477
Barsat-2009	Post-2000	Rht8	Rht-B1b	Rht-D1a	Rht-B1b.Rht-D1a	Hap-L	Hap-II	Hap-6A-A	TT	34.35	32.2	34.3	32.2	3.46875	623.219	4.5	4727.31	1237.19	32.125	79.8125	3450.19	0.222656	4.075	89.575	17.625	18.925	49.65	2.5975	37.6825	NA	NA	NA
Wafaq-2001	Post-2000	Rht8	Rht-B1b	Rht-D1a	Rht-B1b.Rht-D1a	Hap-L	Hap-II	Hap-6A-A	CC	36.55	32	33.8	34.1	3.0625	550.312	4.25	4436.94	1155.38	31.125	37.5	3254.88	0.195625	3.3375	94.1	15.725	18.825	52.6	2.315	38.715	1.228	2.254	6.124
Pirsabak-2005	Post-2000	Rht8	Rht-B1b	Rht-D1a	Rht-B1b.Rht-D1a	Hap-L	Hap-I	Hap-6A-A	TT	35.85	25.4	34.1	28.3	3.78125	560.844	4.75	3731.56	1292.62	36	39.6875	3403.25	0.244219	2.4375	102.575	16.775	17.625	46.875	2.3875	44.52	1.63	2.521	6.352
AS-2002	Post-2000	rht-8	Rht-B1a	Rht-D1b	Rht-B1a.Rht-D1b	Hap-L	Hap-I	Hap-6A-A	TT	26.45	25.35	31.3	28.8	4.21875	680.094	3.875	4584.06	1178.75	37.3125	38.375	3367.06	0.231531	2.8375	85.675	16.5	17.95	50.9	2.3675	44.22	1.244	2.021	6.454
Auqab-2000	Post-2000	Rht8	Rht-B1a	Rht-D1b	Rht-B1a.Rht-D1b	Hap-H	Hap-I	Hap-6A-G	CC	24.8	23.65	32.6	28.3	4.65625	560.344	3.875	4452.69	1116.25	27.9375	23.9375	3343.12	0.233906	3.8375	95.4	19.225	20.025	51.5	2.4675	41.26	1.94	2.466	6.753
Margallah-99	1965-2000	Rht8	Rht-B1a	Rht-D1a	Rht-B1a.Rht-D1a	Hap-L	Hap-II	Hap-6A-A	TT	31.2	28.85	29.5	29	3.5625	510.812	3.375	4373.31	1128	33	14.375	3629.25	0.13225	3.425	102.8	18.25	20.85	61.3	2.24	35.825	1.5755	2.243	6.259
Suleman-96	1965-2000	Rht8	Rht-B1a	Rht-D1a	Rht-B1a.Rht-D1a	Hap-L	Hap-II	Hap-6A-G	CC	33.35	25.85	30.8	27.5	3.5625	593.938	3.625	4457.56	1081.88	30.375	13.125	3315.75	0.141125	3.7	107	22.225	19.3	49.35	1.66	43.52	1.4455	2.343	6.5775
MH-97	1965-2000	Rht8	Rht-B1b	Rht-D1a	Rht-B1b.Rht-D1a	Hap-L	Hap-II	Hap-6A-A	TT	33.1	34.45	33.9	34	5.28125	676.156	3.75	3994.44	1118.12	30.5	17.3125	3206.88	0.215969	3.55	100.975	17.9	20.65	54.95	2.43	32.135	1.374	2.331	5.915
Bakhtawar-94	1965-2000	Rht8	Rht-B1b	Rht-D1a	Rht-B1b.Rht-D1a	Hap-L	Hap-II	Hap-6A-A	CC	38.4	30.8	37.3	29.1	4.21875	612.969	3.8125	4499	1100.38	34.5	46.375	3285.19	0.206406	3.1	104.725	17.675	19.325	53.425	2.5525	43.89	1.514	2.454	6.469
Inquilab-91	1965-2000	Rht8	Rht-B1b	Rht-D1a	Rht-B1b.Rht-D1a	Hap-L	Hap-II	Hap-6A-G	TT	33.45	26.8	33.3	27.4	4.3125	537.688	3.25	4271.69	1149.88	31.875	29.375	3533.62	0.154625	3.1625	95.65	17.25	19.4	54.125	2.2475	35.95	2.038	2.264	6.432
Khyber-87	1965-2000	Rht8	Rht-B1b	Rht-D1a	Rht-B1b.Rht-D1a	Hap-L	Hap-II	Hap-6A-A	CC	27.6	25.15	32.9	28.1	2.4375	622.562	3.375	4613.94	1117.75	35.5	10	3740.5	0.1455	2.825	96.05	17.4	20.025	54.85	2.82	37.705	1.41	2.378	6.445
Ufaq	Post-2000	rht-8	Rht-B1b	Rht-D1a	Rht-B1b.Rht-D1a	Hap-L	Hap-II	Hap-6A-A	CC	25.9	32.95	32.1	37.2	3.78125	719.844	5.1875	4930.69	1265.62	36.6875	23.5625	3624.19	0.253281	3.0125	94.425	18.125	19.775	56.35	1.975	42.68	1.2825	2.3585	6.074
Pasban-90	1965-2000	Rht8	Rht-B1a	Rht-D1b	Rht-B1a.Rht-D1b	Hap-L	Hap-I	Hap-6A-A	TT	33.75	30.55	34.5	32.3	4.28125	564.281	4.4375	4542	1155.5	30.875	22.125	3490.75	0.242781	3.3625	92.75	17.275	18.85	48.875	2.355	43.4075	1.671	2.4705	6.2535
Parula	1965-2000	Rht8	Rht-B1b	Rht-D1a	Rht-B1b.Rht-D1a	Hap-L	Hap-II	Hap-6A-A	TT	32.25	27.05	34.7	30.3	4.53125	597.344	4	4530.5	1177.19	31.5	19.625	3263.19	0.209219	3.525	90.7	17.125	19.95	53.575	2.19	36.8825	1.559	2.34	6.2835
Pastor	1965-2000	Rht8	Rht-B1b	Rht-D1a	Rht-B1b.Rht-D1a	Hap-L	Hap-II	Hap-6A-A	TT	32.25	26.85	33.8	28.1	3.84375	552.656	4.0625	4419.31	1075.38	37.75	15.5625	3254.38	0.218594	3.3375	97.775	16.475	19.725	48.65	2.7	38.1925	1.158	2.1725	6.15
Mexipak-65	1965-2000	Rht8	Rht-B1b	Rht-D1a	Rht-B1b.Rht-D1a	Hap-L	Hap-I	Hap-6A-A	CC	29.75	28.25	33.7	31.8	4.28125	614.844	3.6875	4359.69	1192.5	34.4375	64.6875	3305.12	0.229031	3.25	97.1	16.725	19.85	50.575	1.711	38.355	1.425	2.1505	5.8945
WL-711	1965-2000	Rht8	Rht-B1a	Rht-D1a	Rht-B1a.Rht-D1a	Hap-L	Hap-I	Hap-6A-A	TT	33.1	38.75	35.4	36.6	4.53125	600.531	4.875	4481.12	1287	32.8125	21	3447.12	0.212719	3.7	102.25	16.4	19.725	49.9	2.3625	37.54	1.7725	2.3945	6.262
Pak-81	1965-2000	rht-8	Rht-B1b	Rht-D1a	Rht-B1b.Rht-D1a	Hap-L	Hap-I	Hap-6A-A	CC	30.5	32.5	33.4	33.7	4.09375	588.156	4	4213.38	1243.38	33.6875	82.0625	3189.75	0.246406	3.025	93.2	15.075	18.15	52.05	2.4825	46.68	1.2675	2.339	6.5475
Local-White	Pre-1965	rht-8	Rht-B1a	Rht-D1a	Rht-B1a.Rht-D1a	Hap-H	Hap-I	Hap-6A-A	TT	31.55	34.4	30.6	31.4	4.71875	482.531	5.28125	4071.75	1187.41	33.375	20.4375	3081.25	0.221125	3.4	120.625	12.8	18.7	47.625	1.295	46.1625	1.1145	2.1825	6.3865
C-271	Pre-1965	Rht8	Rht-B1a	Rht-D1a	Rht-B1a.Rht-D1a	Hap-H	Hap-II	Hap-6A-A	TT	32.6	30.95	31.1	28.5	4.40625	538.844	4.46875	3707.62	1173.72	31.125	17.6875	3196.62	0.218438	3.2125	104.775	14.25	18.825	42.95	1.395	40.1125	1.2925	1.9895	5.863
C-273	Pre-1965	Rht8	Rht-B1a	Rht-D1a	Rht-B1a.Rht-D1a	Hap-H	Hap-II	Hap-6A-A	CC	35.55	36.3	33	30.1	3.34375	600.406	5.09375	3591.25	1276.47	36.625	8.75	3286.44	0.258437	3.125	112.1	17.775	19.75	52.25	1.3025	43.6875	1.2305	2.017	6.023
Ujala-2016	Post-2000	Rht8	Rht-B1b	Rht-D1a	Rht-B1b.Rht-D1a	Hap-L	Hap-I	Hap-6A-A	CC	28.8	26.7	26.8	23.9	2.8125	507.688	3.0625	3943.56	1047.81	26.25	27.5	2861.88	0.164187	3.2375	94.85	14.925	17.775	44.1	2.6325	42.6475	1.162	2.14	6.346
Tatara	1965-2000	Rht8	Rht-B1a	Rht-D1a	Rht-B1a.Rht-D1a	Hap-L	Hap-II	Hap-6A-A	TT	32.95	27.3	30.5	25.5	4.03125	599.031	3.59375	4304.31	988.469	27.9375	18.5	2868.38	0.182938	2.95	94.25	15.925	18.875	55.825	1.9825	39.8275	1.427	2.353	6.457
Bathoor	Post-2000	Rht8	Rht-B1b	Rht-D1a	Rht-B1b.Rht-D1a	Hap-L	Hap-II	Hap-6A-A	CC	32.55	25.3	34.5	24.9	4.96875	553.531	4.09375	4079.62	969.719	32.8125	13.1875	2718.81	0.199563	3.525	90.9	14.075	19.825	53.4	2.165	35.68	1.271	2.2675	6.28
Pirsabak-2004	Post-2000	Rht8	Rht-B1b	Rht-D1a	Rht-B1b.Rht-D1a	Hap-L	Hap-II	Hap-6A-A	CC	29.9	30.2	32.9	27.3	4.03125	498.719	4.15625	4232.56	1015.91	28.5	21.8125	2883.5	0.196625	3.1875	97.2	17.75	19.725	54.3	1.9675	38.5325	1.2775	2.293	6.2215
Dirk	Pre-1965	rht-8	Rht-B1b	Rht-D1a	Rht-B1b.Rht-D1a	Hap-H	Hap-II	Hap-6A-A	TT	35.15	24	31	18.8	2.6875	453.312	3.8125	4118.06	983.688	24.375	44.5	2751.75	0.198813	3.4625	108.075	16.55	19.95	51.925	1.8375	44.12	1.161	2.445	6.651
Bhakkar-2002	Post-2000	Rht8	Rht-B1a	Rht-D1b	Rht-B1a.Rht-D1b	Hap-L	Hap-I	Hap-6A-A	CC	33.35	36.05	37.6	34.6	3.09375	626.031	5.46875	4647.88	1194.16	29.3125	34.6875	3478.56	0.188	3.5125	82.1	16.925	18.375	51.85	2.2075	35.3675	1.4075	2.3645	5.768
Barani-83	1965-2000	Rht8	Rht-B1b	Rht-D1a	Rht-B1b.Rht-D1a	Hap-L	Hap-I	Hap-6A-G	TT	27.75	27.5	31.8	27.7	5.96875	640.969	5.09375	4808.81	1113.09	26.1875	80.75	3393.94	0.230375	3.1875	107.2	15.1	19.425	52.275	1.3125	39.8975	1.3415	2.4165	6.337
C-217	Pre-1965	Rht8	Rht-B1a	Rht-D1a	Rht-B1a.Rht-D1a	Hap-H	Hap-II	Hap-6A-A	TT	31	32.65	30.5	31.8	3.96875	590.594	4.90625	3883.94	1221.66	31.3125	43.625	3265.5	0.248562	3.5	104.225	14.8	19.2	46.175	1.0975	42.9275	1.3635	1.974	5.879
C-518	Pre-1965	Rht8	Rht-B1a	Rht-D1a	Rht-B1a.Rht-D1a	Hap-H	Hap-II	Hap-6A-A	CC	42.05	38.4	38.6	33.1	4.78125	634.781	4.78125	3959.19	1287.78	37.4375	47.25	3348.62	0.242375	4.1	117.225	18.475	20.325	40.825	1.2925	47.22	1.247	2.0275	6.036
Chakwal-86	1965-2000	rht-8	Rht-B1b	Rht-D1a	Rht-B1b.Rht-D1a	Hap-H	Hap-II	Hap-6A-A	TT	28	24.7	30.8	26	5.21875	507.156	4.40625	4254.94	1080.03	25.5625	107.625	3104.12	0.201437	4.3125	106.35	17.8	20.4	48.925	2.4875	44.685	1.272	2.3915	6.6075
Chakwal-97	1965-2000	Rht8	Rht-B1b	Rht-D1a	Rht-B1b.Rht-D1a	Hap-L	Hap-I	Hap-6A-G	TT	35.1	25.2	34.1	25.3	4.28125	557.281	4.03125	4034.62	1049.22	32	24.9375	3151.19	0.202875	3.725	105.15	15.675	19.4	60.7	2.0275	40.675	1.472	2.192	6.367
GA-2002	Post-2000	Rht8	Rht-B1b	Rht-D1a	Rht-B1b.Rht-D1a	Hap-L	Hap-II	Hap-6A-A	CC	30.6	29.05	34.3	30.2	4.71875	570.906	5.03125	4491.06	1139.47	28.875	64.4375	3438.31	0.237875	3.625	91.7	16.1	19.85	56.625	1.8675	44.2175	1.2845	2.325	6.2125
Pari-73	1965-2000	Rht8	Rht-B1b	Rht-D1b	Rht-B1a.Rht-D1b	Hap-L	Hap-I	Hap-6A-A	TT	28.55	32.5	33.4	32.7	5.03125	700.656	5.09375	4890.62	1218.16	33.375	51.3125	3731.19	0.234625	3.6625	77.125	15.075	18.475	52.725	1.2975	40.2075	1.4745	2.731	6.376
Parwaz-94	1965-2000	Rht8	Rht-B1b	Rht-D1a	Rht-B1b.Rht-D1a	Hap-L	Hap-I	Hap-6A-A	CC	34.15	29.65	33.4	29.7	7.78125	609.906	4.84375	4283.88	1158.41	35.0625	38.4375	3397.19	0.225312	3.9625	84.3	19.1	20.275	54.3	1.685	37.935	1.219	2.4265	6.4675
Pothowar-70	1965-2000	Rht8	Rht-B1a	Rht-D1b	Rht-B1a.Rht-D1b	Hap-L	Hap-I	Hap-6A-A	TT	28.3	38.6	32.1	40.8	4.1875	657.188	5.6875	4703.81	1318.19	34.625	158.625	3918	0.243938	4.3375	103.9	18.575	20.8	55	1.6125	35.1475	NA	NA	NA
Punjab-96	1965-2000	Rht8	Rht-B1b	Rht-D1a	Rht-B1b.Rht-D1a	Hap-L	Hap-II	Hap-6A-G	CC	31.95	29	32.5	29.3	4.4375	529.062	5.0625	4275.81	1138.94	31.5	40.875	3484.88	0.154688	3.9125	94.025	16.85	20.075	54.475	2.1975	36.7125	NA	NA	NA
Rawal-87	1965-2000	Rht8	Rht-B1b	Rht-D1a	Rht-B1b.Rht-D1a	Hap-L	Hap-I	Hap-6A-G	TT	34.9	24.1	26.9	20.4	4.1875	475.688	3.3125	3761.81	922.562	29.25	28.125	2861.88	0.157188	4.1625	97	16.35	20.825	53.7	1.4525	36.775	1.347	2.235	6.652
T9	Pre-1965	Rht8	Rht-B1a	Rht-D1a	Rht-B1a.Rht-D1a	Hap-H	Hap-II	Hap-6A-A	CC	40.75	35.05	34.1	27.6	3.1875	528.812	4.4375	3912.19	1139.19	31.25	18.375	2825.38	0.238313	4.25	108.375	16.125	18.05	39.275	0.975	39.3575	1.319	2.15	6.2485
